# Supplementary material for: Improved lipid productivity in Nannochloropsis gaditana in nitrogen-replete conditions by selection of pale green mutants
Source: PubMed Central journal article supplement (PMC7175523; doi:10.1186/s13068-020-01718-8), 2020-04-21

## ADDITIONAL FILE 1

**Table S1.** Coverage obtained by Illumina sequencing for WT and *e8* mutant strain.

|                      | <i>WT</i> | <i>e8</i> |
|----------------------|-----------|-----------|
| <i>mean coverage</i> | 115.02    | 72.42     |
| <i>% 1X cov</i>      | 98.79     | 98.81     |
| <i>% 5X cov</i>      | 98.47     | 98.63     |
| <i>% 10X cov</i>     | 98.01     | 98.10     |
| <i>% 20X cov</i>     | 96.92     | 95.77     |

**Table S2. Mutation identified on gene coding for proteins putatively located in the chloroplast.** Prediction of chloroplast transit peptide was performed with Hectar software.

| <b>Mutant</b> | <b>Gene</b>     | <b>Mutation</b>     | <b>Annotation</b>                              |
|---------------|-----------------|---------------------|------------------------------------------------|
| <i>e8</i>     | Naga_100008g127 | 3_prime_UTR_variant | Protein of unknown function DUF1118            |
| <i>e8</i>     | Naga_100040g45  | missense_variant    | nhl repeat containing protein 2                |
| <i>e8</i>     | Naga_100340g1   | missense_variant    | chaperone protein                              |
| <i>e8</i>     | Naga_100641g4   | missense_variant    | dehydrogenase reductase sdr family<br>member 9 |

**Supplementary Figure S1. Mutants screening by 680/730 nm absorption ratio.** Absorption ratio 680/730 nm was used to assay the chlorophylls per cell content. Only colonies with a reduction of at least 25% was selected for further analyses. Error bars are reported as standard deviation (n=3).

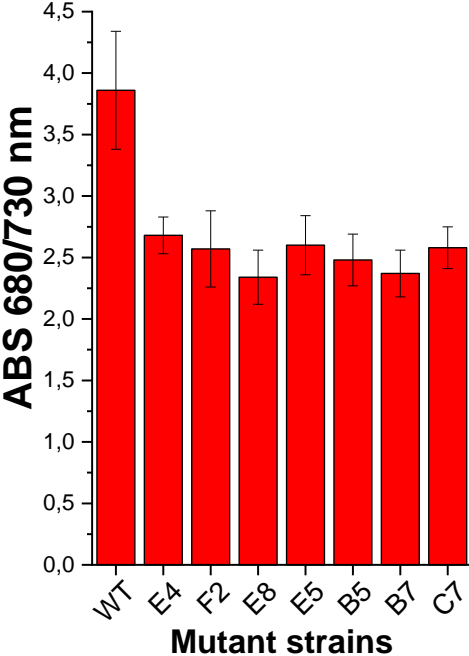

**Supplementary Figure S2. Light dependent zeaxanthin accumulation in WT and *e8*.** Samples were illuminated for 1 h with a strong light ( $2500 \mu\text{mol photons m}^{-2} \text{s}^{-1}$ ). Pigments composition was evaluated at different time points by DMSO extraction and HPLC analysis. (A) Depoxidation index calculated as  $(\text{zea} + \text{anthera}/2) / (\text{anthera} + \text{viola} + \text{zea})$ . (B) Zeaxanthin per carotenoid content. (C) Zeaxanthin per chlorophyll content. Errors are reported as standard deviation, significantly different values are marked with \* if  $p < 0.05$  and \*\* if  $p < 0.01$ , as determined by unpaired two-sample t-test ( $n=3$ ).

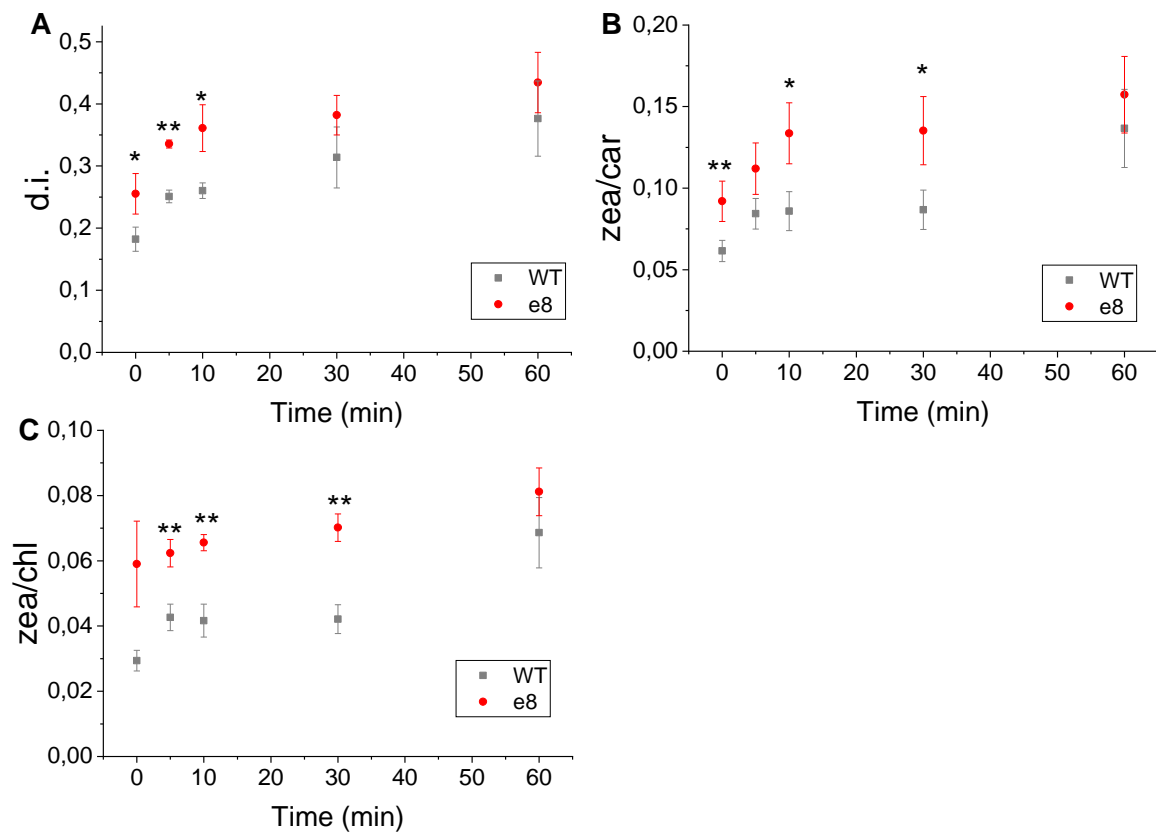

**Supplementary Figure S3. Chlorophyll bleaching in wild type and *e8* mutant strain exposed to strong light.** Chlorophyll bleaching kinetics of WT and *e8* mutant strains were determined measuring the decrease of chlorophyll absorption upon exposure to 2500  $\mu\text{mol photons m}^{-2} \text{s}^{-1}$ . Errors are reported as standard deviation, (n=3). The statistical analysis of the results obtained was performed by unpaired two sample t-test revealing no statistically significant difference being p-values > 0.1 at the different time points.

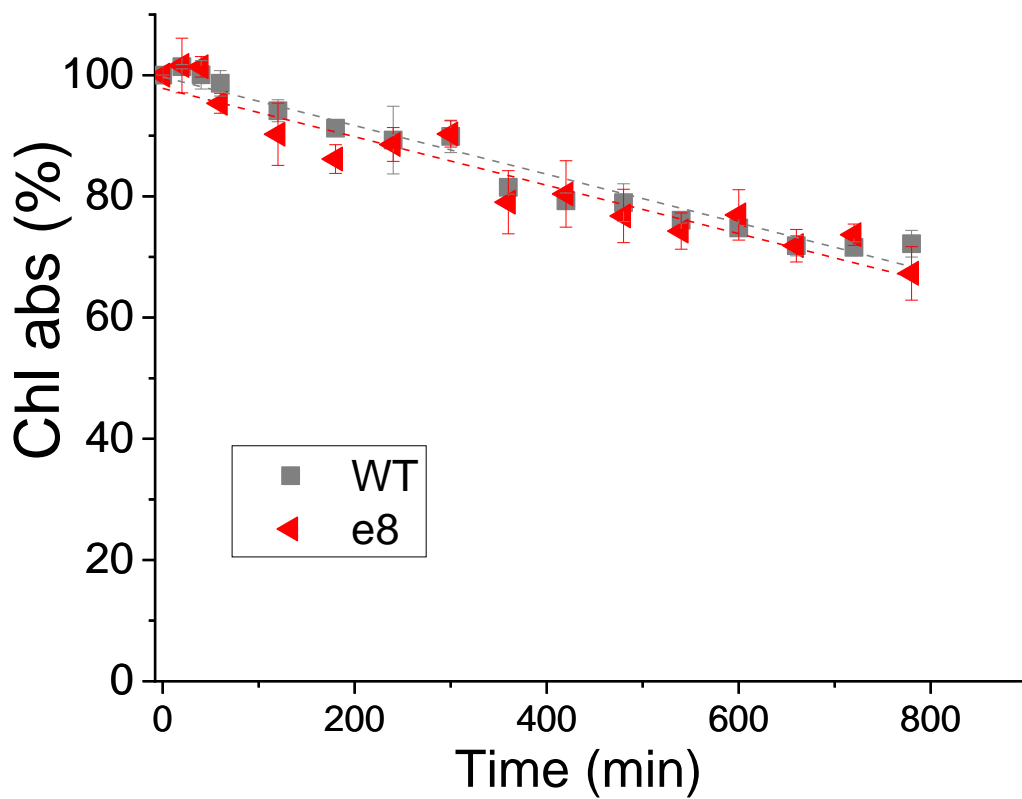

**Supplementary Figure S4. Biomass and lipid productivity of WT and e8 mutant at different irradiances.**

(A) Maximum daily productivity in terms of  $\text{gr L}^{-1} \text{day}^{-1}$ . (B, C) Nile Red fluorescence of WT and e8 mutant normalized to dry weight (B) or to the culture volume (C). (D) Fold change of Nile Red fluorescence and biomass dry weight on a volumetric base in e8 mutant compared to WT. Errors are reported as standard deviation, significantly different values are marked with \* if  $p < 0.05$  and \*\* if  $p < 0.01$ , as determined by unpaired two sample t-test ( $n=3$ ).

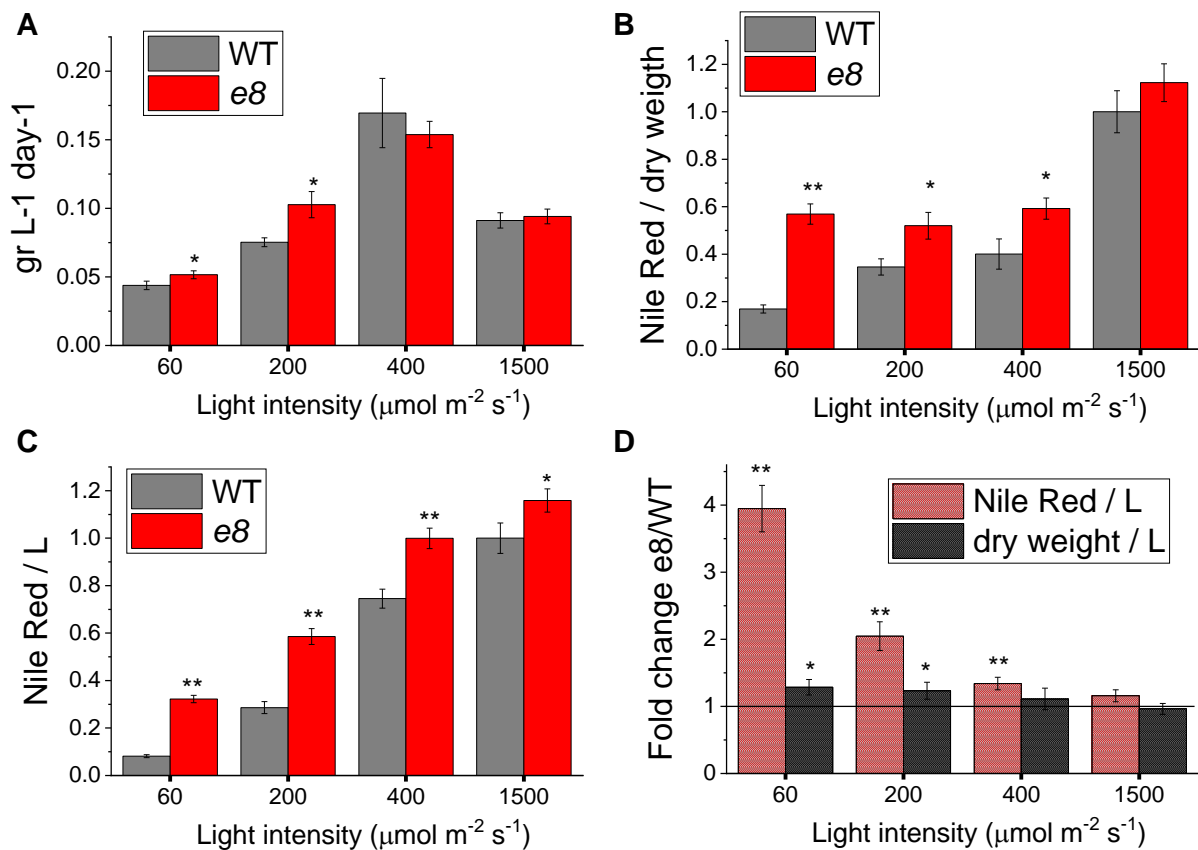

**Supplementary Figure S5. Dry weight and FAME content in WT and e8 mutant in nitrogen starvation.**

Dry weight(A) and FAME content (B) in cells grown in nitrogen deplete medium for WT and *e8* mutant strain. Errors are reported as standard deviation, the statistical significance of differences between WT and *e8* is indicated as \*\* ( $p < 0.01$ ), as determined by unpaired two-sample t-test ( $n=3$ ).

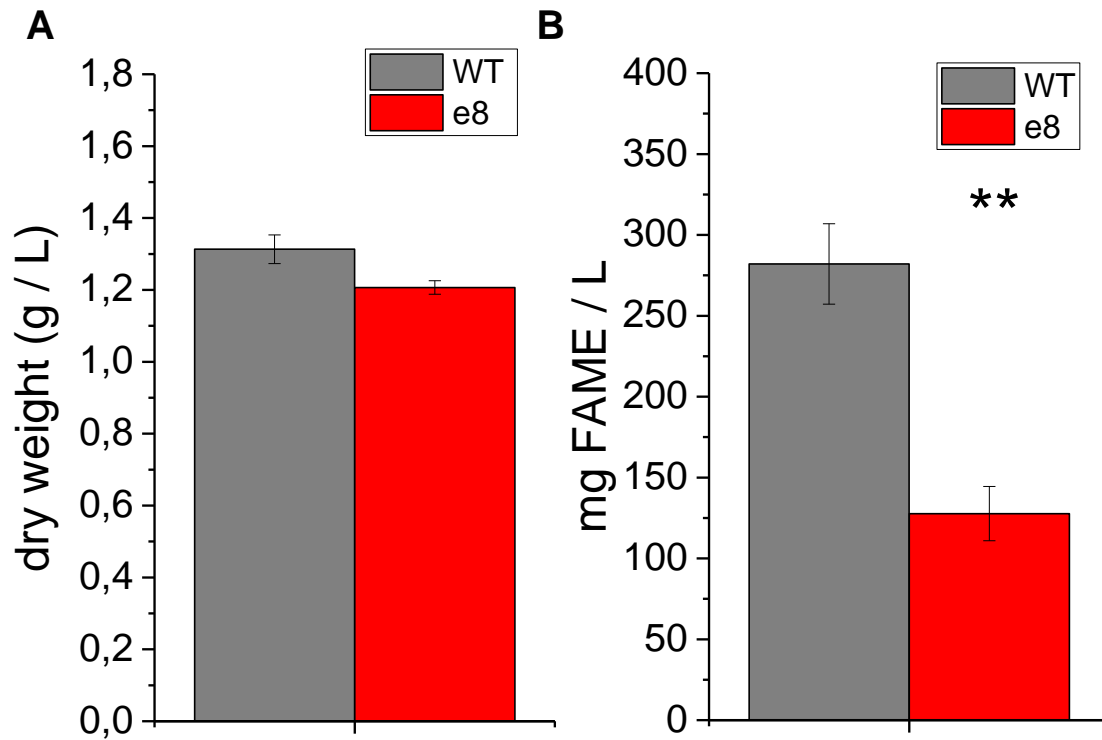

**Supplementary Figure S6. Acyl chain composition of lipid fraction from WT and *e8* mutant in nitrogen replete conditions (+N) or after nitrogen starvation (-N).** (A) fatty acid content per liter of culture. (B) Fold change of fatty acid fraction on total fatty acids content in *e8* normalized to the WT case. Errors are reported as standard deviation, statistically significantly different values between WT and *e8* in (A) and values statistically significantly different than 1 in (B) are marked with \* if  $p < 0.05$  and \*\* if  $p < 0.01$ , as determined by unpaired two sample t-test ( $n=3$ ).

**A**

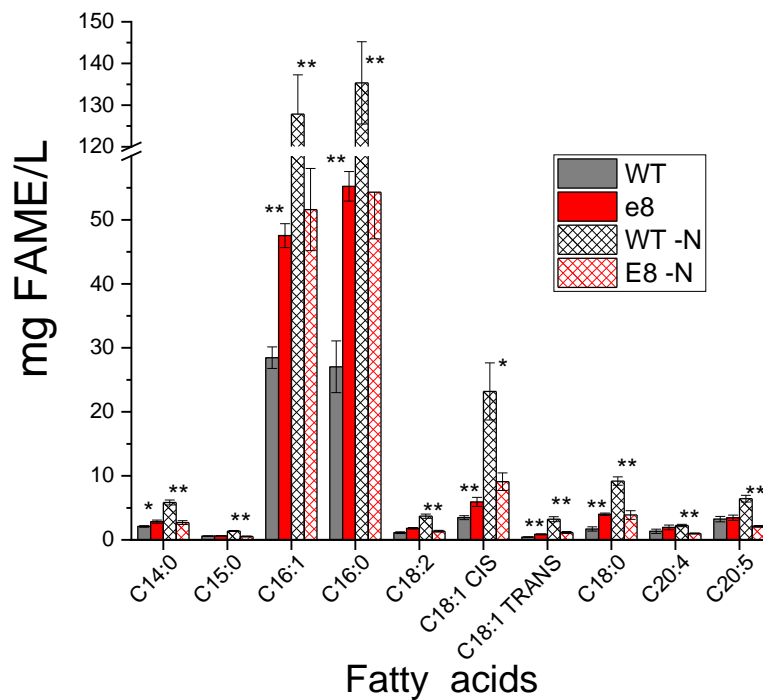

**B**

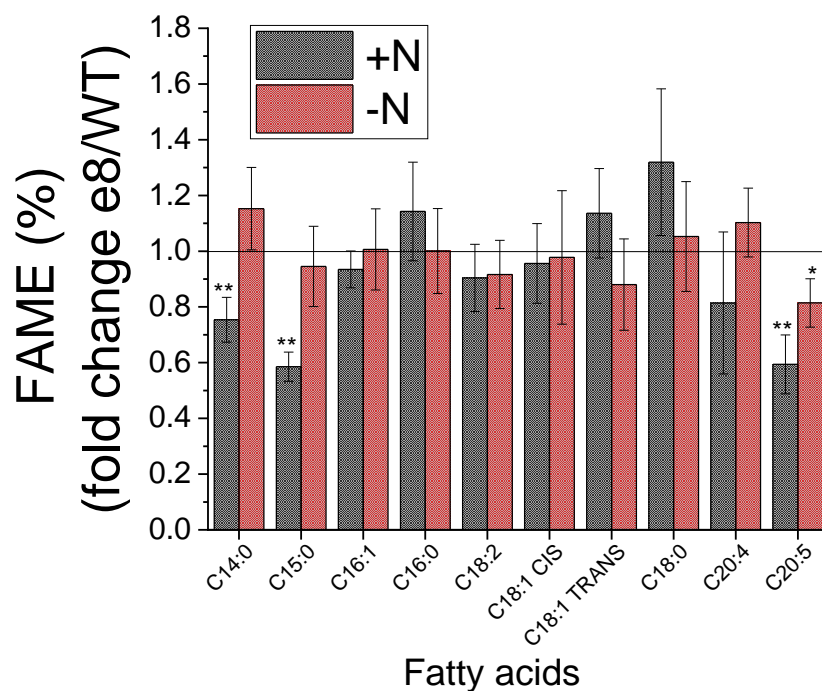

**Supplementary Figure S7.** Visible light transmittance in photobioreactors at different layers for WT and *e8* mutant cultures.

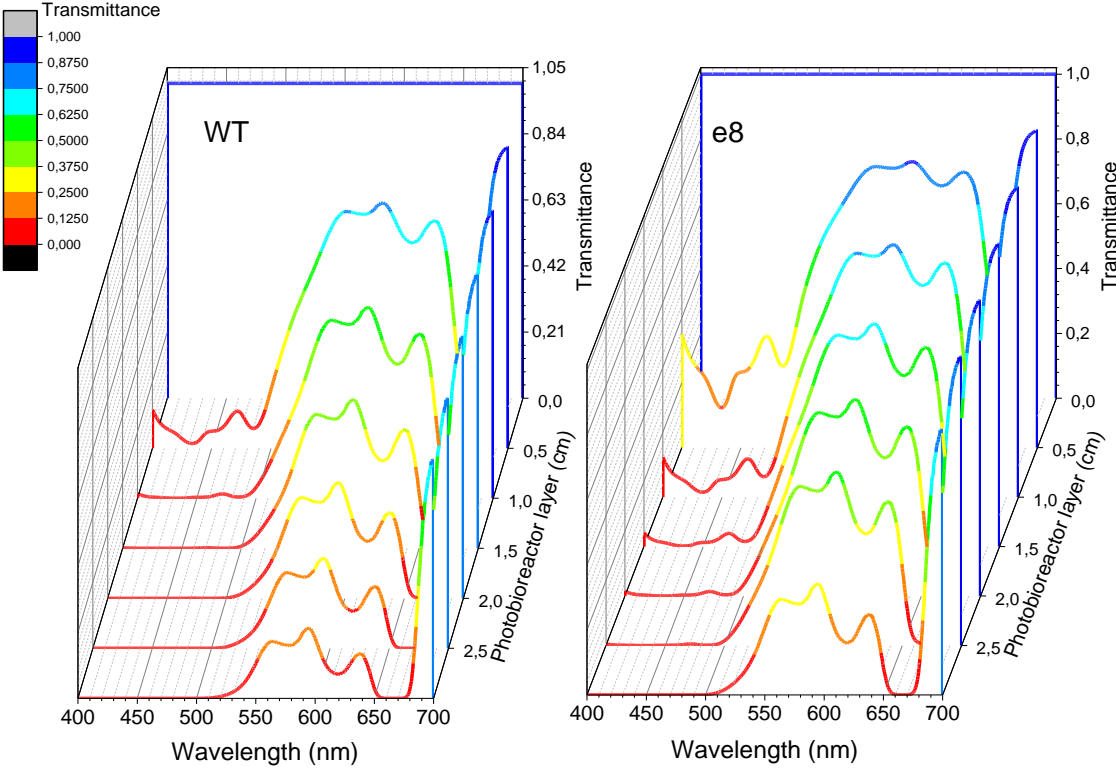



**Supplementary Figure S8. GO slim terms of mutated genes of *e8*.** The GO terms were restricted to GO slim terms of plant for an easier visualization. Each dot is proportional with the number of genes related to a specific category of GO terms (max 30 genes, min 1 genes).

**A) BIOLOGICAL PROCESS**

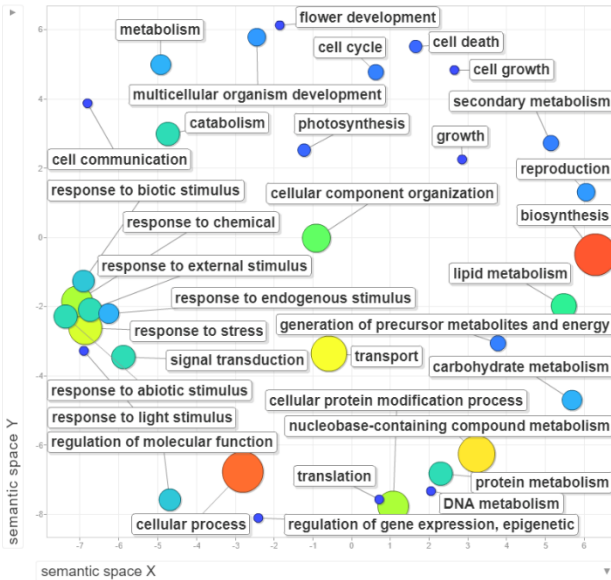

**B) MOLECULAR FUNCTION**

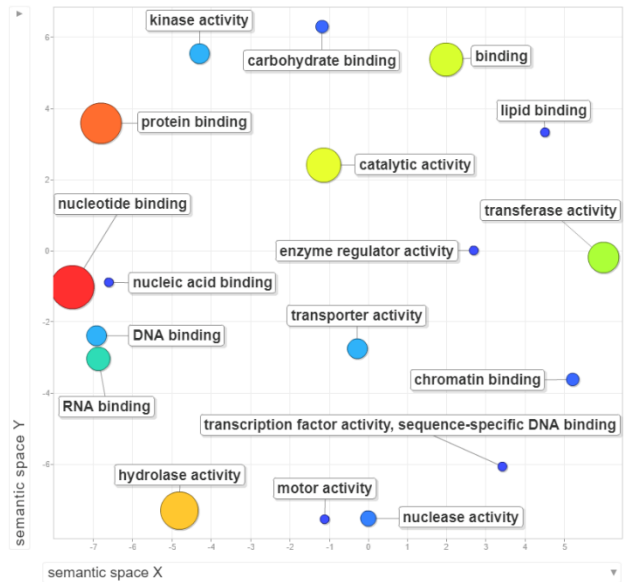

**C) CELLULAR COMPONENT**

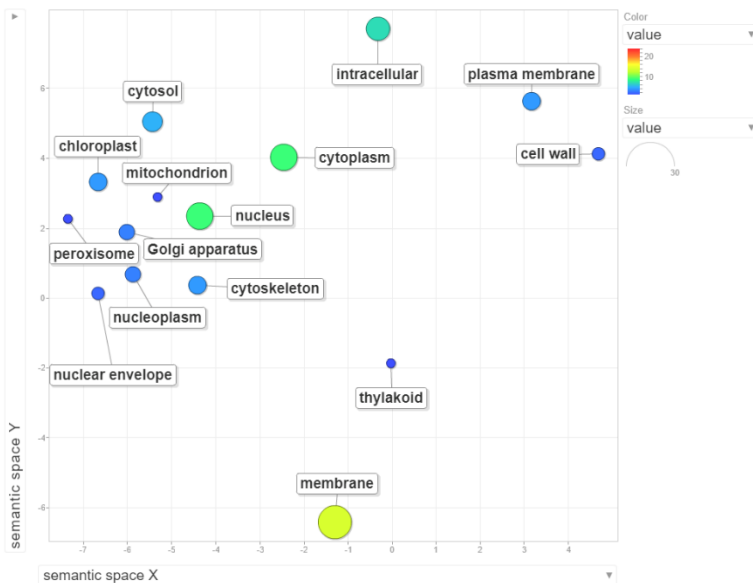

Supplement: 13068_2020_1718_MOESM1_ESM.pdf [file 13068_2020_1718_MOESM1_ESM.pdf]
